# Supplementary material for: Prognostic Factors Analysis in Breast Cancer Patients with Brain Metastases: Identification of Key Determinants of Survival
Source: Research Square preprint supplement (doi:10.21203/rs.3.rs-8009638/v1), 2025-11-17
Supplement: Supplementary file 1 [file 29c70745d5d573298f8729ea.docx]

**Prognostic Factors Analysis in Breast Cancer Patients with Brain Metastases: Identification of Key Determinants of Survival**

**Supplementary Material 1**

Supplementary Table 1. Results of univariate and multivariate analysis of survival related factors in 505 breast cancer patients with brain metastases.

| Variables | Univariate analysis |  | | | Multivariate analysis |
| --- | --- | --- | --- | --- | --- |
| *P* | HR (95%CI) |  | *P* | HR (95%CI) |
| Age |  |  |  |  |  |
| ＞45 |  |  |  |  |  |
| ≤45 | 0.879 | 1.02 (0.83 ~ 1.25) |  |  |  |
| Menopausal conditions |  |  |  |  |  |
| No |  |  |  |  |  |
| Yes | 0.356 | 1.11 (0.89 ~ 1.37) |  |  |  |
| Histological grade |  |  |  |  |  |
| 1 grade |  |  |  |  |  |
| 2 grade | 0.207 | 1.77 (0.73 ~ 4.31) |  |  |  |
| 3 grade | 0.780 | 1.04 (0.80 ~ 1.34) |  |  |  |
| unknow | 0.820 | 0.97 (0.72 ~ 1.30) |  |  |  |
| T stage |  |  |  |  |  |
| T1 |  |  |  |  |  |
| T2 | 0.974 | 1.01 (0.67 ~ 1.50) |  |  |  |
| T3 | 0.380 | 1.23 (0.78 ~ 1.94) |  |  |  |
| T4 | 0.891 | 0.97 (0.64 ~ 1.48) |  |  |  |
| Tx | 0.313 | 1.23 (0.82 ~ 1.83) |  |  |  |
| N stage |  |  |  |  |  |
| N0 |  |  |  |  |  |
| N1 | 0.647 | 1.08 (0.77 ~ 1.52) |  |  |  |
| N2 | 0.868 | 0.97 (0.67 ~ 1.41) |  |  |  |
| N3 | 0.218 | 1.25 (0.88 ~ 1.77) |  |  |  |
| Nx | 0.297 | 1.20 (0.85 ~ 1.69) |  |  |  |
| M stage |  |  |  |  |  |
| M 0 |  |  |  |  |  |
| M1 | 0.229 | 0.86 (0.66 ~ 1.10) |  |  |  |
| Estrogen receptor |  |  |  |  |  |
| Negative |  |  |  |  |  |
| Positive | 0.671 | 0.95 (0.76 ~ 1.19) |  |  |  |
| unknown | 0.705 | 0.93 (0.65 ~ 1.34) |  |  |  |
| HER2 |  |  |  |  |  |
| Negative |  |  |  |  |  |
| Positive | 0.102 | 0.81 (0.64 ~ 1.04) |  |  |  |
| unknown | 0.841 | 1.03 (0.80 ~ 1.33) |  |  |  |
| Molecular subtyping |  |  |  |  |  |
| Luminal A |  |  |  |  |  |
| Luminal B | 0.082 | 0.72 (0.50 ~ 1.04) |  | 0.078 | 0.71 (0.49 ~ 1.04) |
| HER2 overexpression type | 0.094 | 0.70 (0.46 ~ 1.06) |  | 0.140 | 0.71 (0.46 ~ 1.12) |
| Triple negative type | 0.742 | 0.93 (0.62 ~ 1.41) |  | 0.644 | 0.90 (0.59 ~ 1.39) |
| unknown | 0.173 | 0.76 (0.51 ~ 1.13) |  | 0.066 | 0.69 (0.46 ~ 1.02) |
| Neoadjuvant chemotherapy |  |  |  |  |  |
| No |  |  |  |  |  |
| Yes | 0.089 | 0.83 (0.68 ~ 1.03) |  | 0.584 | 0.94 (0.74 ~ 1.18) |
| Breast Surgery |  |  |  |  |  |
| No |  |  |  |  |  |
| Radical surgery | 0.666 | 1.06 (0.82 ~ 1.37) |  |  |  |
| Breast-conserving surgery | 0.609 | 0.88 (0.54 ~ 1.44) |  |  |  |
| unknown | 0.666 | 1.12 (0.68 ~ 1.85) |  |  |  |
| Adjuvant chemotherapy |  |  |  |  |  |
| No |  |  |  |  |  |
| Yes | 0.075 | 1.22 (0.98 ~ 1.51) |  | 0.068 | 1.24 (0.98 ~ 1.57) |
| Radiotherapy for the Breast |  |  |  |  |  |
| No |  |  |  |  |  |
| Yes | 0.276 | 0.89 (0.72 ~ 1.10) |  |  |  |
| Maintenance treatment |  |  |  |  |  |
| No |  |  |  |  |  |
| Endocrine Therapy | 0.746 | 1.04 (0.81 ~ 1.34) |  |  |  |
| Targeted Therapy | 0.237 | 0.79 (0.53 ~ 1.17) |  |  |  |
| Endocrine and targeted therapy | 0.136 | 0.68 (0.41 ~ 1.13) |  |  |  |
| Chemotherapy | 0.455 | 1.13 (0.82 ~ 1.56) |  |  |  |
| Size of brain metastases |  |  |  |  |  |
| ＞1cm |  |  |  |  |  |
| ≤1cm | 0.903 | 0.98 (0.76 ~ 1.28) |  |  |  |
| Number of brain metastases |  |  |  |  |  |
| ＞4 |  |  |  |  |  |
| ≤4 | 0.002 | 1.40 (1.13 ~ 1.74) |  | <.001 | 1.55 (1.23 ~ 1.95) |
| Leptomeningeal metastases |  |  |  |  |  |
| No |  |  |  |  |  |
| Yes | 0.009 | 1.54 (1.11 ~ 2.14) |  | 0.084 | 1.35 (0.96 ~ 1.89) |
| Location of brain metastases |  |  |  |  |  |
| Supratentorial transfer |  |  |  |  |  |
| Subtentorial transfer | 0.023 | 1.28 (1.03 ~ 1.58) |  | 0.166 | 1.17 (0.94 ~ 1.46) |
| unknown | 0.629 | 1.16 (0.64 ~ 2.08) |  | 0.167 | 1.54 (0.84 ~ 2.82) |
| Clinical symptoms |  |  |  |  |  |
| No |  |  |  |  |  |
| Yes | 0.919 | 1.01 (0.82 ~ 1.24) |  |  |  |
| Craniocerebral surgery |  |  |  |  |  |
| No |  |  |  |  |  |
| Yes | 0.032 | 0.65 (0.44 ~ 0.96) |  | 0.100 | 0.71 (0.48 ~ 1.07) |
| Endocrine Therapy |  |  |  |  |  |
| No |  |  |  |  |  |
| Yes | 0.064 | 0.79 (0.62 ~ 1.01) |  | 0.259 | 0.86 (0.66 ~ 1.12) |
| Chemotherapy |  |  |  |  |  |
| No |  |  |  |  |  |
| Yes | 0.045 | 0.80 (0.65 ~ 0.99) |  | 0.661 | 0.95 (0.74 ~ 1.21) |
| Targeted Therapy |  |  |  |  |  |
| No |  |  |  |  |  |
| Yes | 0.085 | 0.80 (0.63 ~ 1.03) |  | 0.904 | 1.02 (0.75 ~ 1.39) |
| Craniocerebral radiotherapy |  |  |  |  |  |
| No |  |  |  |  |  |
| Yes | <.001 | 0.52 (0.42 ~ 0.64) |  | <.001 | 0.47 (0.38 ~ 0.60) |

Supplementary Table 2. Baseline table before and after propensity matching between TBI group and non-TBI group.

| Variable | Before PSM | | | | | |  | After PSM | | | | | |
| --- | --- | --- | --- | --- | --- | --- | --- | --- | --- | --- | --- | --- | --- |
| Total (n = 505) | No RT (n = 212) | RT (n = 293) | Statistic | *P* | SMD | Total (n = 308) | No RT (n = 154) | RT (n = 154) | Statistic | *P* | SMD |
| Histological grade, n (%) |  |  |  | - | 0.877 |  |  |  |  |  | - | 0.655 |  |
| unknown | 304 (60.2) | 131 (61.79) | 173 (59.04) |  |  | -0.056 |  | 184 (59.74) | 93 (60.39) | 91 (59.09) |  |  | -0.026 |
| I grade | 6 (1.19) | 3 (1.42) | 3 (1.02) |  |  | -0.039 |  | 2 (0.65) | 0 (0.00) | 2 (1.30) |  |  | 0.115 |
| II grade | 112 (22.18) | 45 (21.23) | 67 (22.87) |  |  | 0.039 |  | 65 (21.1) | 34 (22.08) | 31 (20.13) |  |  | -0.049 |
| III grade | 83 (16.44) | 33 (15.57) | 50 (17.06) |  |  | 0.040 |  | 57 (18.51) | 27 (17.53) | 30 (19.48) |  |  | 0.049 |
| Estrogen receptor, n (%) |  |  |  | χ²=16.121 | <.001 |  |  |  |  |  | χ²=0.232 | 0.890 |  |
| Negative | 194 (38.42) | 71 (33.49) | 123 (41.98) |  |  | 0.172 |  | 129 (41.88) | 64 (41.56) | 65 (42.21) |  |  | 0.013 |
| Positive | 259 (51.29) | 106 (50.00) | 153 (52.22) |  |  | 0.044 |  | 155 (50.32) | 79 (51.30) | 76 (49.35) |  |  | -0.039 |
| unknown | 52 (10.3) | 35 (16.51) | 17 (5.80) |  |  | -0.458 |  | 24 (7.79) | 11 (7.14) | 13 (8.44) |  |  | 0.047 |
| Age, n (%) |  |  |  | χ²=0.727 | 0.394 |  |  |  |  |  | χ²=0.211 | 0.646 |  |
| ＜45 | 216 (42.77) | 86 (40.57) | 130 (44.37) |  |  | 0.077 |  | 136 (44.16) | 66 (42.86) | 70 (45.45) |  |  | 0.052 |
| ≥45 | 289 (57.23) | 126 (59.43) | 163 (55.63) |  |  | -0.077 |  | 172 (55.84) | 88 (57.14) | 84 (54.55) |  |  | -0.052 |
| Menopausal conditions, n (%) |  |  |  | χ²=5.680 | 0.017 |  |  |  |  |  | χ²=0.891 | 0.345 |  |
| No | 314 (62.18) | 119 (56.13) | 195 (66.55) |  |  | 0.221 |  | 194 (62.99) | 93 (60.39) | 101 (65.58) |  |  | 0.109 |
| Yes | 191 (37.82) | 93 (43.87) | 98 (33.45) |  |  | -0.221 |  | 114 (37.01) | 61 (39.61) | 53 (34.42) |  |  | -0.109 |
| T stage, n (%) |  |  |  | χ²=10.091 | 0.039 |  |  |  |  |  | χ²=0.561 | 0.967 |  |
| T1 | 43 (8.51) | 15 (7.08) | 28 (9.56) |  |  | 0.084 |  | 30 (9.74) | 14 (9.09) | 16 (10.39) |  |  | 0.043 |
| T2 | 150 (29.7) | 52 (24.53) | 98 (33.45) |  |  | 0.189 |  | 86 (27.92) | 42 (27.27) | 44 (28.57) |  |  | 0.029 |
| T3 | 58 (11.49) | 27 (12.74) | 31 (10.58) |  |  | -0.070 |  | 36 (11.69) | 17 (11.04) | 19 (12.34) |  |  | 0.039 |
| T4 | 110 (21.78) | 44 (20.75) | 66 (22.53) |  |  | 0.042 |  | 72 (23.38) | 38 (24.68) | 34 (22.08) |  |  | -0.063 |
| Tx | 144 (28.51) | 74 (34.91) | 70 (23.89) |  |  | -0.258 |  | 84 (27.27) | 43 (27.92) | 41 (26.62) |  |  | -0.029 |
| N stage, n (%) |  |  |  | χ²=13.917 | 0.008 |  |  |  |  |  | χ²=0.807 | 0.938 |  |
| N0 | 75 (14.85) | 31 (14.62) | 44 (15.02) |  |  | 0.011 |  | 48 (15.58) | 24 (15.58) | 24 (15.58) |  |  | 0.000 |
| N1 | 126 (24.95) | 46 (21.70) | 80 (27.30) |  |  | 0.126 |  | 71 (23.05) | 38 (24.68) | 33 (21.43) |  |  | -0.079 |
| N2 | 88 (17.43) | 29 (13.68) | 59 (20.14) |  |  | 0.161 |  | 55 (17.86) | 25 (16.23) | 30 (19.48) |  |  | 0.082 |
| N3 | 102 (20.2) | 42 (19.81) | 60 (20.48) |  |  | 0.017 |  | 64 (20.78) | 32 (20.78) | 32 (20.78) |  |  | 0.000 |
| Nx | 114 (22.57) | 64 (30.19) | 50 (17.06) |  |  | -0.349 |  | 70 (22.73) | 35 (22.73) | 35 (22.73) |  |  | 0.000 |
| M stage, n (%) |  |  |  | χ²=7.780 | 0.005 |  |  |  |  |  | χ²=0.266 | 0.606 |  |
| M0 | 384 (76.04) | 148 (69.81) | 236 (80.55) |  |  | 0.271 |  | 226 (73.38) | 111 (72.08) | 115 (74.68) |  |  | 0.060 |
| M1 | 121 (23.96) | 64 (30.19) | 57 (19.45) |  |  | -0.271 |  | 82 (26.62) | 43 (27.92) | 39 (25.32) |  |  | -0.060 |
| Pathological pattern, n (%) |  |  |  | χ²=10.079 | 0.006 |  |  |  |  |  | χ²=1.864 | 0.394 |  |
| Non-invasive carcinoma | 19 (3.76) | 10 (4.72) | 9 (3.07) |  |  | -0.095 |  | 10 (3.25) | 7 (4.55) | 3 (1.95) |  |  | -0.188 |
| Invasive carcinoma | 453 (89.7) | 180 (84.91) | 273 (93.17) |  |  | 0.328 |  | 282 (91.56) | 140 (90.91) | 142 (92.21) |  |  | 0.048 |
| unknown | 33 (6.53) | 22 (10.38) | 11 (3.75) |  |  | -0.348 |  | 16 (5.19) | 7 (4.55) | 9 (5.84) |  |  | 0.055 |
| Neoadjuvant chemotherapy, n (%) |  |  |  | χ²=9.828 | 0.002 |  |  |  |  |  | χ²=0.117 | 0.732 |  |
| No | 278 (55.05) | 134 (63.21) | 144 (49.15) |  |  | -0.281 |  | 165 (53.57) | 84 (54.55) | 81 (52.60) |  |  | -0.039 |
| Yes | 227 (44.95) | 78 (36.79) | 149 (50.85) |  |  | 0.281 |  | 143 (46.43) | 70 (45.45) | 73 (47.40) |  |  | 0.039 |
| HER2, n (%) |  |  |  | χ²=34.551 | <.001 |  |  |  |  |  | χ²=0.231 | 0.891 |  |
| Negative | 183 (36.24) | 70 (33.02) | 113 (38.57) |  |  | 0.114 |  | 125 (40.58) | 64 (41.56) | 61 (39.61) |  |  | -0.040 |
| Positive | 184 (36.44) | 56 (26.42) | 128 (43.69) |  |  | 0.348 |  | 110 (35.71) | 53 (34.42) | 57 (37.01) |  |  | 0.054 |
| unknown | 138 (27.33) | 86 (40.57) | 52 (17.75) |  |  | -0.597 |  | 73 (23.7) | 37 (24.03) | 36 (23.38) |  |  | -0.015 |
| Molecular subtyping, n (%) |  |  |  | χ²=18.984 | <.001 |  |  |  |  |  | χ²=0.774 | 0.942 |  |
| Luminal A | 44 (8.71) | 13 (6.13) | 31 (10.58) |  |  | 0.145 |  | 22 (7.14) | 11 (7.14) | 11 (7.14) |  |  | 0.000 |
| Luminal B | 188 (37.23) | 81 (38.21) | 107 (36.52) |  |  | -0.035 |  | 116 (37.66) | 58 (37.66) | 58 (37.66) |  |  | 0.000 |
| HER2 overexpression type | 94 (18.61) | 27 (12.74) | 67 (22.87) |  |  | 0.241 |  | 56 (18.18) | 26 (16.88) | 30 (19.48) |  |  | 0.066 |
| Triple negative type | 73 (14.46) | 31 (14.62) | 42 (14.33) |  |  | -0.008 |  | 53 (17.21) | 29 (18.83) | 24 (15.58) |  |  | -0.090 |
| HER2, n (%) | 106 (20.99) | 60 (28.30) | 46 (15.70) |  |  | -0.346 |  | 61 (19.81) | 30 (19.48) | 31 (20.13) |  |  | 0.016 |
| Breast-conserving surgery |  |  |  | χ²=11.815 | 0.008 |  |  |  |  |  | χ²=0.889 | 0.828 |  |
| unknown | 114 (22.57) | 60 (28.30) | 54 (18.43) |  |  | -0.255 |  | 76 (24.68) | 40 (25.97) | 36 (23.38) |  |  | -0.061 |
| Adjuvant chemotherapy, n (%) | 332 (65.74) | 122 (57.55) | 210 (71.67) |  |  | 0.313 |  | 196 (63.64) | 95 (61.69) | 101 (65.58) |  |  | 0.082 |
| No | 31 (6.14) | 14 (6.60) | 17 (5.80) |  |  | -0.034 |  | 21 (6.82) | 12 (7.79) | 9 (5.84) |  |  | -0.083 |
| Yes | 28 (5.54) | 16 (7.55) | 12 (4.10) |  |  | -0.174 |  | 15 (4.87) | 7 (4.55) | 8 (5.19) |  |  | 0.029 |
| Radiotherapy for the Breast, n (%) |  |  |  | χ²=0.083 | 0.773 |  |  |  |  |  | χ²=0.056 | 0.813 |  |
| No | 194 (38.42) | 83 (39.15) | 111 (37.88) |  |  | -0.026 |  | 114 (37.01) | 58 (37.66) | 56 (36.36) |  |  | -0.027 |
| Yes | 311 (61.58) | 129 (60.85) | 182 (62.12) |  |  | 0.026 |  | 194 (62.99) | 96 (62.34) | 98 (63.64) |  |  | 0.027 |
| Maintenance treatment, n (%) |  |  |  | χ²=1.998 | 0.158 |  |  |  |  |  | χ²=0.054 | 0.816 |  |
| No | 284 (56.24) | 127 (59.91) | 157 (53.58) |  |  | -0.127 |  | 186 (60.39) | 92 (59.74) | 94 (61.04) |  |  | 0.027 |
| Endocrine Therapy | 221 (43.76) | 85 (40.09) | 136 (46.42) |  |  | 0.127 |  | 122 (39.61) | 62 (40.26) | 60 (38.96) |  |  | -0.027 |
| Targeted Therapy |  |  |  | χ²=8.028 | 0.091 |  |  |  |  |  | χ²=0.498 | 0.974 |  |
| Endocrine and targeted therapy | 240 (47.52) | 108 (50.94) | 132 (45.05) |  |  | -0.118 |  | 155 (50.32) | 79 (51.30) | 76 (49.35) |  |  | -0.039 |
| Chemotherapy | 119 (23.56) | 49 (23.11) | 70 (23.89) |  |  | 0.018 |  | 70 (22.73) | 35 (22.73) | 35 (22.73) |  |  | 0.000 |
| Breast-conserving surgery | 50 (9.9) | 13 (6.13) | 37 (12.63) |  |  | 0.196 |  | 24 (7.79) | 11 (7.14) | 13 (8.44) |  |  | 0.047 |
| unknown | 32 (6.34) | 11 (5.19) | 21 (7.17) |  |  | 0.077 |  | 16 (5.19) | 7 (4.55) | 9 (5.84) |  |  | 0.055 |
| Adjuvant chemotherapy, n (%) | 64 (12.67) | 31 (14.62) | 33 (11.26) |  |  | -0.106 |  | 43 (13.96) | 22 (14.29) | 21 (13.64) |  |  | -0.019 |
| Size of brain metastases, n (%) |  |  |  | χ²=0.201 | 0.654 |  |  |  |  |  | χ²=0.090 | 0.764 |  |
| ≤1cm | 405 (80.2) | 172 (81.13) | 233 (79.52) |  |  | -0.040 |  | 254 (82.47) | 126 (81.82) | 128 (83.12) |  |  | 0.035 |
| ＞1cm | 100 (19.8) | 40 (18.87) | 60 (20.48) |  |  | 0.040 |  | 54 (17.53) | 28 (18.18) | 26 (16.88) |  |  | -0.035 |
| Number of brain metastases, n (%) |  |  |  | χ²=9.096 | 0.003 |  |  |  |  |  | χ²=0.000 | 1.000 |  |
| ≤4 | 344 (68.12) | 160 (75.47) | 184 (62.80) |  |  | -0.262 |  | 220 (71.43) | 110 (71.43) | 110 (71.43) |  |  | 0.000 |
| ＞4 | 161 (31.88) | 52 (24.53) | 109 (37.20) |  |  | 0.262 |  | 88 (28.57) | 44 (28.57) | 44 (28.57) |  |  | 0.000 |
| Leptomeningeal metastases, n (%) |  |  |  | χ²=7.398 | 0.007 |  |  |  |  |  | χ²=0.132 | 0.716 |  |
| No | 455 (90.1) | 182 (85.85) | 273 (93.17) |  |  | 0.290 |  | 274 (88.96) | 136 (88.31) | 138 (89.61) |  |  | 0.043 |
| Yes | 50 (9.9) | 30 (14.15) | 20 (6.83) |  |  | -0.290 |  | 34 (11.04) | 18 (11.69) | 16 (10.39) |  |  | -0.043 |
| Location of brain metastases, n (%) |  |  |  | χ²=15.929 | <.001 |  |  |  |  |  | χ²=0.119 | 0.730 |  |
| Supratentorial transfer | 247 (48.91) | 116 (54.72) | 131 (44.71) |  |  | -0.201 |  | 173 (56.17) | 85 (55.19) | 88 (57.14) |  |  | 0.039 |
| Subtentorial transfer | 240 (47.52) | 96 (45.28) | 144 (49.15) |  |  | 0.077 |  | 135 (43.83) | 69 (44.81) | 66 (42.86) |  |  | -0.039 |
| unknown | 18 (3.56) | 0 (0.00) | 18 (6.14) |  |  | 0.256 |  |  |  |  |  |  |  |
| Clinical symptoms, n (%) |  |  |  | χ²=11.362 | <.001 |  |  |  |  |  | χ²=0.000 | 1.000 |  |
| No | 287 (56.83) | 139 (65.57) | 148 (50.51) |  |  | -0.301 |  | 192 (62.34) | 96 (62.34) | 96 (62.34) |  |  | 0.000 |
| Yes | 218 (43.17) | 73 (34.43) | 145 (49.49) |  |  | 0.301 |  | 116 (37.66) | 58 (37.66) | 58 (37.66) |  |  | 0.000 |
| Craniocerebral surgery, n (%) |  |  |  | χ²=0.598 | 0.439 |  |  |  |  |  | χ²=0.000 | 1.000 |  |
| No | 463 (91.68) | 192 (90.57) | 271 (92.49) |  |  | 0.073 |  | 280 (90.91) | 140 (90.91) | 140 (90.91) |  |  | 0.000 |
| Yes | 42 (8.32) | 20 (9.43) | 22 (7.51) |  |  | -0.073 |  | 28 (9.09) | 14 (9.09) | 14 (9.09) |  |  | 0.000 |
| Endocrine Therapy, n (%) |  |  |  | χ²=3.979 | 0.046 |  |  |  |  |  | χ²=0.189 | 0.664 |  |
| No | 390 (77.23) | 173 (81.60) | 217 (74.06) |  |  | -0.172 |  | 249 (80.84) | 123 (79.87) | 126 (81.82) |  |  | 0.051 |
| Yes | 115 (22.77) | 39 (18.40) | 76 (25.94) |  |  | 0.172 |  | 59 (19.16) | 31 (20.13) | 28 (18.18) |  |  | -0.051 |
| Chemotherapy, n (%) |  |  |  | χ²=10.674 | 0.001 |  |  |  |  |  | χ²=1.991 | 0.158 |  |
| No | 187 (37.03) | 96 (45.28) | 91 (31.06) |  |  | -0.307 |  | 116 (37.66) | 64 (41.56) | 52 (33.77) |  |  | -0.165 |
| Yes | 318 (62.97) | 116 (54.72) | 202 (68.94) |  |  | 0.307 |  | 192 (62.34) | 90 (58.44) | 102 (66.23) |  |  | 0.165 |
| Targeted Therapy, n (%) |  |  |  | χ²=12.393 | <.001 |  |  |  |  |  | χ²=0.449 | 0.503 |  |
| No | 379 (75.05) | 176 (83.02) | 203 (69.28) |  |  | -0.298 |  | 235 (76.3) | 120 (77.92) | 115 (74.68) |  |  | -0.075 |
| Yes | 126 (24.95) | 36 (16.98) | 90 (30.72) |  |  | 0.298 |  | 73 (23.7) | 34 (22.08) | 39 (25.32) |  |  | 0.075 |

Supplementary Table3. Univariate and Multivariate Analysis of Intracranial PFS in 298 BCBM Patients Treated with RT. HER2: Human Epidermal Growth Factor Receptor 2; SRS: Stereotactic Radiosurgery; WBRT: Whole Brain Radiation Therapy

| Variables | Univariate analysis | |  | | | | Multivariate analysis |
| --- | --- | --- | --- | --- | --- | --- | --- |
| *P* | HR (95%CI) | |  | *P* | HR (95%CI) | |
| Age |  |  | |  |  |  | |
| ＞45 |  | 1.00 (Reference) | |  |  |  | |
| ≤ 45 | 0.311 | 0.85 (0.63 ~ 1.16) | |  |  |  | |
| Pathological pattern |  |  | |  |  |  | |
| Invasive carcinoma |  | 1.00 (Reference) | |  |  |  | |
| Other | 0.343 | 1.35 (0.73 ~ 2.51) | |  |  |  | |
| Estrogen receptor |  |  | |  |  |  | |
| Unknow |  | 1.00 (Reference) | |  |  |  | |
| Positive | 0.771 | 1.12 (0.52 ~ 2.43) | |  |  |  | |
| Negative | 0.704 | 1.16 (0.53 ~ 2.53) | |  |  |  | |
| HER2 |  |  | |  |  |  | |
| Unknow |  | 1.00 (Reference) | |  |  |  | |
| Positive | 0.577 | 1.14 (0.72 ~ 1.79) | |  |  |  | |
| Negative | 0.120 | 1.43 (0.91 ~ 2.24) | |  |  |  | |
| Ki67 |  |  | |  |  |  | |
| ＜14% |  | 1.00 (Reference) | |  |  |  | |
| ≥14% | 0.903 | 1.03 (0.69 ~ 1.53) | |  |  |  | |
| Unknow | 0.613 | 0.85 (0.46 ~ 1.57) | |  |  |  | |
| Size of brain metastases |  |  | |  |  |  | |
| ＞1cm |  | 1.00 (Reference) | |  |  |  | |
| ≤1cm | 0.853 | 0.96 (0.66 ~ 1.42) | |  |  |  | |
| Unknow | 0.921 | 1.04 (0.48 ~ 2.26) | |  |  |  | |
| Number of brain metastases |  |  | |  |  |  | |
| ＞4 |  | 1.00 (Reference) | |  |  |  | |
| ≤4 | 0.551 | 1.12 (0.77 ~ 1.63) | |  |  |  | |
| Unknow | 0.499 | 1.18 (0.73 ~ 1.92) | |  |  |  | |
| Leptomeningeal metastases |  |  | |  |  |  | |
| No |  | 1.00 (Reference) | |  |  | 1.00 (Reference) | |
| Yes | <.001 | 3.43 (1.94 ~ 6.06) | |  | <.001 | 3.07 (1.73 ~ 5.45) | |
| Location of brain metastases |  |  | |  |  |  | |
| Unknow |  | 1.00 (Reference) | |  |  |  | |
| Supratentorial transfer | 0.658 | 0.86 (0.44 ~ 1.67) | |  |  |  | |
| Subtentorial transfer | 0.701 | 0.88 (0.45 ~ 1.70) | |  |  |  | |
| Clinical symptoms |  |  | |  |  |  | |
| No |  | 1.00 (Reference) | |  |  |  | |
| Yes | 0.291 | 0.85 (0.62 ~ 1.15) | |  |  |  | |
| Craniocerebral surgery |  |  | |  |  |  | |
| No |  | 1.00 (Reference) | |  |  | 1.00 (Reference) | |
| Yes | 0.081 | 0.55 (0.28 ~ 1.08) | |  | 0.077 | 0.54 (0.27 ~ 1.07) | |
| Endocrine Therapy |  |  | |  |  |  | |
| No |  | 1.00 (Reference) | |  |  | 1.00 (Reference) | |
| Yes | 0.094 | 0.73 (0.51 ~ 1.05) | |  | 0.079 | 0.72 (0.50 ~ 1.04) | |
| Chemotherapy |  |  | |  |  |  | |
| No |  | 1.00 (Reference) | |  |  | 1.00 (Reference) | |
| Yes | 0.063 | 0.74 (0.54 ~ 1.02) | |  | 0.070 | 0.75 (0.54 ~ 1.02) | |
| Targeted Therapy |  |  | |  |  |  | |
| No |  | 1.00 (Reference) | |  |  |  | |
| Yes | 0.978 | 1.01 (0.70 ~ 1.45) | |  |  |  | |
| Methods of radiotherapy |  |  | |  |  |  | |
| SRS |  | 1.00 (Reference) | |  |  |  | |
| WBRT | 0.744 | 1.06 (0.76 ~ 1.46) | |  |  |  | |
| Concomitant medications for radiotherapy |  |  | |  |  |  | |
| No |  | 1.00 (Reference) | |  |  |  | |
| Yes | 0.339 | 0.86 (0.63 ~ 1.17) | |  |  |  | |
| Extracranial metastasis |  |  | |  |  |  | |
| No |  | 1.00 (Reference) | |  |  |  | |
| Yes | 0.154 | 1.31 (0.90 ~ 1.90) | |  |  |  | |


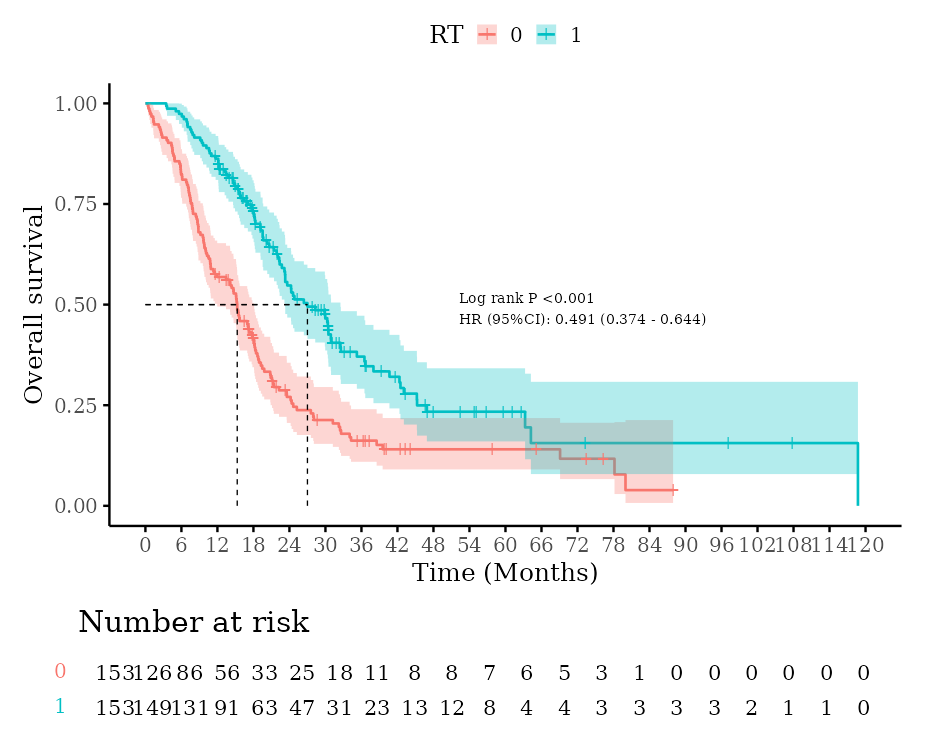


Supplementary Figure 1. After propensity score matching, Kaplan-Meier analysis and log-rank test were used to compare the survival time between the brain radiotherapy group and the non-radiotherapy group of breast cancer patients with brain metastases.

（A）


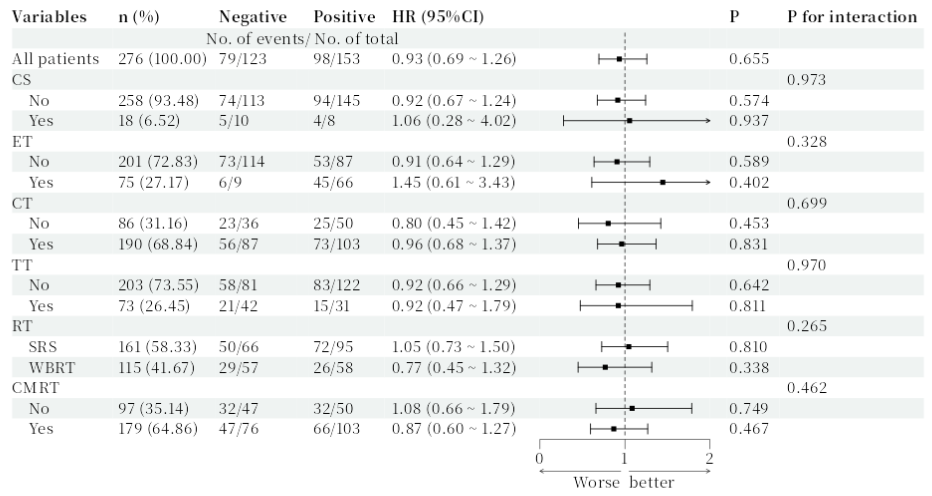


（B）


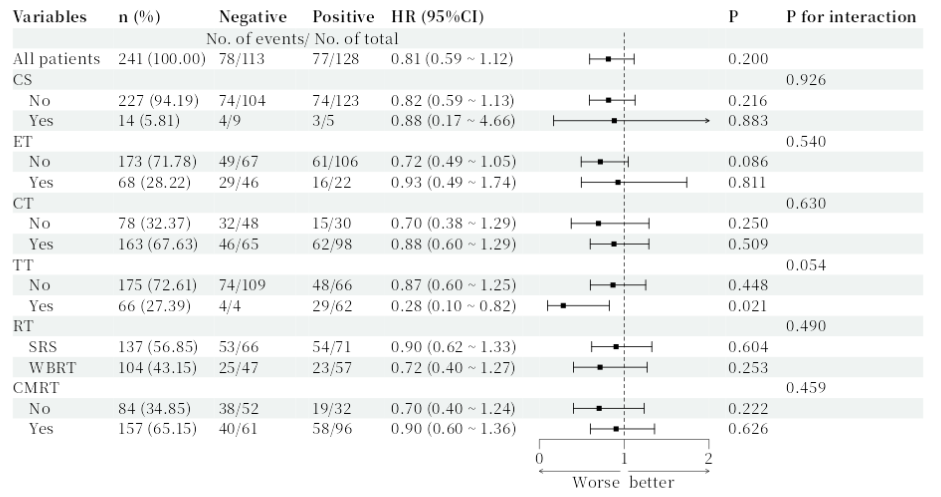


Supplementary Figure 2. Forest Plot of Subgroup Analysis for BCBM Patients Treated with RT. (A) Association between different treatment strategies after BM and RT-OS, stratified by ER expression status. (B) Association between different treatment strategies after BM and RT-OS, stratified by HER2 expression status. CS: Craniocerebral surgery; ET: Endocrine Therapy; CT: Chemotherapy; TT: Targeted Therapy; RT: Radiation therapy; CMRT: Concomitant medications for radiotherapy.


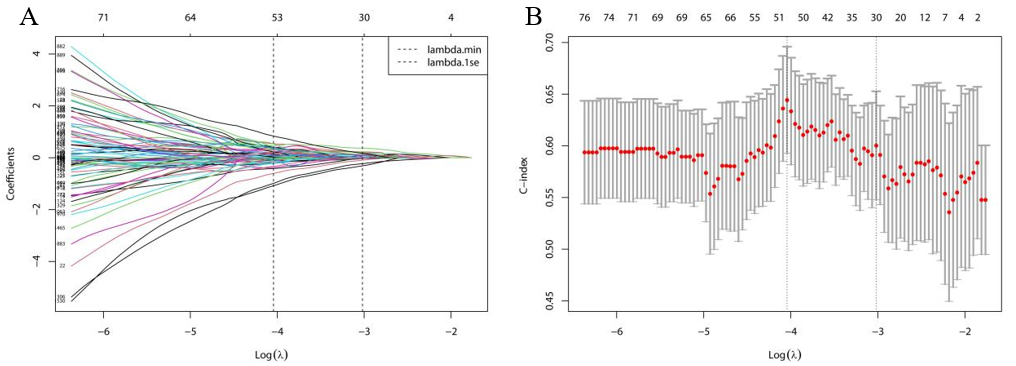


Supplementary Figure 3. Feature Selection Using LASSO-Cox Regression for Survival-Associated Predictors. (A) Trajectory of LASSO regression coefficients across different values of log(λ). (B) Relationship between log(λ) and the corresponding model deviance (error).

**Supplementary Material 2**

Predictive model related code

library(Matrix)

library(glmnet) # Core package for LASSO regression

library(survival) # Survival analysis package

install.packages("survminer")

library(ggpubr)

library(survminer) # Survival analysis visualization

library(ggplot2)

surv_data <- X149AA ### Imported Excel name

# Data Preprocessing

y <- Surv(surv_data$OS, surv_data$live) # Create survival object

x <- as.matrix(surv_data[, 3:ncol(surv_data)]) # Predictor variable matrix

# Check and handle missing values (adjust based on actual situation)

if(sum(is.na(x)) > 0) {

x <- na.omit(x) # Simply delete rows with missing values (or use imputation)

y <- y[rownames(x), ]

warning("Deleted samples containing missing values")}

# Standardize predictor variables (LASSO requires standardization)

x_scaled <- scale(x) # Mean = 0, Standard deviation = 1

#### LASSO Cox Regression

# Set up cross-validation

install.packages("doParallel")

library(foreach)

library(iterators)

library(parallel)

library(doParallel)

cv_fit <- cv.glmnet(

x = x_scaled,

y = y,

family = "cox", # Cox proportional hazards model

type.measure = "C", # Evaluate model using C-index

alpha = 1, # 1 = LASSO (0 = Ridge regression)

nfolds = 10, # 10-fold cross-validation

parallel = TRUE # Enable parallel processing if doParallel is installed

)

# Visualize cross-validation results

plot(cv_fit) # Show C-index and error at different lambda values

title("LASSO Cox Regression Cross-Validation Results", line = 2.5)

# Select optimal lambda values

lambda_min <- cv_fit$lambda.min # Lambda giving best C-index

lambda_1se <- cv_fit$lambda.1se # Most simplified model within 1 standard error

cat("Optimal lambda (min):", lambda_min, "\n")

cat("Simplified model lambda (1se):", lambda_1se, "\n")

# Extract final model

## Use lambda.min (prioritizes prediction accuracy) or lambda.1se (prioritizes simplicity)

final_model <- glmnet(

x = x_scaled,

y = y,

family = "cox",

alpha = 1)

# Get non-zero coefficient features

coef_min <- coef(final_model, s = lambda_min)

coef_1se <- coef(final_model, s = lambda_1se)

selected_min <- which(as.vector(coef_min) != 0)

selected_1se <- which(as.vector(coef_1se) != 0)

cat("\nNumber of features selected using lambda.min:", length(selected_min), "\n")

cat("Feature names:", colnames(x)[selected_min], "\n")

cat("\nNumber of features selected using lambda.1se:", length(selected_1se), "\n")

cat("Feature names:", colnames(x)[selected_1se], "\n")

# Visualize coefficient path

plot(final_model, xvar = "lambda", label = TRUE)

abline(v = log(c(lambda_min, lambda_1se)), lty = 2)

title("LASSO Coefficient Path Plot", line = 2.5)

legend("topright", legend = c("lambda.min", "lambda.1se"), lty = 2, col = 1)

# Model Evaluation

# Calculate predicted risk scores

risk_scores <- predict(final_model, newx = x_scaled, s = lambda_1se, type = "response")

# Save important results

# Output selected features and their coefficients

final_coef <- coef(final_model, s = lambda_1se)

selected_features <- final_coef[which(final_coef != 0), ]

cat("\nFinal model features and coefficients:\n")

print(selected_features)

### Multivariate COX Regression Analysis

install.packages("survival")

library(survival)

model <- coxph(Surv(OS, live) ~ ART+Size+Location+CT+KPS+YXLLHWFK+YXLLHWFmedian+

YXLHLWGLALGLE+YXLHLWNS+YXHLLWFmedian+YXHLLWGDV+YXHLHWFmean+

YXHLHWGLRLGLE+YXHHLWFmean+YXHHLWGSAE+YXHHHWGZE+JLOF10P+JLOGLGLE+

JLLLHWGSZNUN+JLLHLWFSn+JLLHHWGSE+JLLHHWGSAE+JLHLLWFSn+JLHLLWGMCC+

JLHLHWGDeE+JLHHLWGLGLZE+JLHHLWGSZNUN+JLHHHWFSn+JLLLLWGCl+

JLLLLWGLGLZE ,data = surv_data)

summary(model)

## Dynamic Nomogram

library(Hmisc)

library(rms)

install.packages("regplot")

library(regplot)

f <- cph(Surv(OS_years, live) ~ Location+CT+KPS+YXLLHWFK+

YXLHLWGLALGLE+YXLHLWNS+JLLHHWGSAE+JLHHLWGLGLZE+JLLLLWGLGLZE, data = da, maxit=15, x=T, y=T, surv=T)

regplot(f, observation = Idw_exper[4,], # Specify a specific patient, 85 means selecting the 85th patient in the dataset

interval = "confidence", title = "Nomogram",

plots = c("violin", "boxes"), clickable = T,

failtime = c(3, 2, 1)) # Set follow-up times: 1 year, 2 years, 3 years

# Time-dependent ROC for Nomogram: 1-year, 2-year, 3-year ROC

install.packages("survivalROC")

library(survivalROC)

da1 <- data.frame(Idw_exper)

cutoff <- 3

newdata <- predict(f, type = "lp") # Calculate combined prediction probability

write.csv(newdata, file = "C:/Users/Administrator/Desktop/final_prediction_probability_lp.csv")

# Set prediction time points (Year 1, 2, 3)

times <- c(1, 2, 3)

# Calculate ROC curves for each time point

roc_data <- lapply(times, function(t) {

survivalROC(

Stime = Idw_exper$OS_years, # Survival time

status = Idw_exper$live, # Event status

marker = Idw_exper$x, # Prediction values

predict.time = t, # Prediction time point

method = "NNE", # Non-parametric kernel estimation method

span = 0.25 * nrow(Idw_exper)^(-0.20) # Smoothing parameter

)

})

# Set plot colors

colors <- c("#E41A1C", "#377EB8", "#4DAF4A")

# Plot combined ROC curves

plot(roc_data[[1]]$FP, roc_data[[1]]$TP,

type = "l", col = colors[1], lwd = 2,

xlim = c(0, 1), ylim = c(0, 1),

xlab = "1 - Specificity (False Positive Rate)",

ylab = "Sensitivity (True Positive Rate)",

main = "Time-Dependent ROC Curves for COX Model")

abline(0, 1, lty = 2, col = "gray") # Add reference line

# Add curves for other time points

for (i in 2:length(times)) {

lines(roc_data[[i]]$FP, roc_data[[i]]$TP,

col = colors[i], lwd = 2)

}

# Add legend and AUC values

legend_text <- paste0("Year ", times, " (AUC = ",

sapply(roc_data, function(x) round(x$AUC, 3)), ")")

legend("bottomright",

legend = legend_text,

col = colors,

lty = 1,

lwd = 2,

title = "Time Points",

bty = "n")

# Add grid lines

grid(col = "lightgray", lty = "dotted")

box()

################## Calculate various statistical metrics

roc <- survivalROC(

Stime = Idw_exper$OS_years, # Survival time

status = Idw_exper$live, # Event status

marker = Idw_exper$x, # Prediction values

predict.time = 3, # Prediction time point

method = "KM", # Kaplan-Meier method

)

#### Optimal threshold

youden_index <- roc$TP - roc$FP

best_idx <- which.max(youden_index)

best_threshold <- roc$cut.values[best_idx]

# Calculate confusion matrix

predicted_class <- ifelse(Idw_exper$x >= best_threshold, 1, 0)

actual_class <- ifelse(Idw_exper$OS_years <= 3 & Idw_exper$live == 1, 1, 0)

# Calculate metrics

TP <- sum(predicted_class == 1 & actual_class == 1)

TN <- sum(predicted_class == 0 & actual_class == 0)

FP <- sum(predicted_class == 1 & actual_class == 0)

FN <- sum(predicted_class == 0 & actual_class == 1)

sensitivity <- TP / (TP + FN)

specificity <- TN / (TN + FP)

accuracy <- (TP + TN) / (TP + TN + FP + FN)

# Output results

cat("Threshold =", best_threshold, "\n",

"Sensitivity =", round(sensitivity, 3), "\n",

"Specificity =", round(specificity, 3), "\n",

"Accuracy =", round(accuracy, 3))

# Nomogram Calibration Curve

da <- data.frame(Idw_exper)

dc <- datadist(da)

options(datadist = "dc")

ff0.5 <- cph(Surv(OS_days, live) ~ Location+CT+KPS+YXLLHWFK+

YXLHLWGLALGLE+YXLHLWNS+JLLHHWGSAE+JLHHLWGLGLZE+JLLLLWGLGLZE, data = da, x=T, y=T, surv=T, time.inc=360)

cal_0.5 <- calibrate(ff0.5, cmethod='KM', method='boot', u=360, m=40, B=1000)

par(mar=c(7,4,4,3), cex=1.0)

plot(cal_0.5, lwd=2, lty=1, errbar.col=c(rgb(0,118,192,maxColorValue=255)), xlab='Nomogram 1-year OS Calibration Curve', ylab='1-year OS', col=c(rgb(192,98,83,maxColorValue=255)),

xlim=c(0,1), ylim=c(0,1))

## DCA (Decision Curve Analysis)

library(dcurves)

library(foreign)

library(survival)

library(dplyr)

str(Idw_exper)

f1 <- coxph(Surv(OS, live) ~ Location+CT+KPS+YXLLHWFK+

YXLHLWGLALGLE+YXLHLWNS+JLLHHWGSAE+JLHHLWGLGLZE+JLLLLWGLGLZE, data = Idw_exper)

Idw_exper$pr_failure1 = c(1-(summary(survfit(f1, newdata=Idw_exper), times=36)$surv))

dca(Surv(OS, live) ~ pr_failure1, data = Idw_exper, time=36, thresholds=1:50/100) %>%

plot(smooth=T)
